# Supplementary material
Source: MDPI journal article supplement (https://www.mdpi.com/2075-1702/9/2/27)
Supplement: s1 [file s1]

for declaration=1:1:1
clear;
b=1;
a0=0.800;
a1=0.950;
a2=0.600;
a3=0.400;
a4=0.400;
ap=0.400;
detmin=10^20;
Teta1=144;
Teta2=123;
conte=0;
lonte=0;
donte=0;
ponte=0;
sonte=0;
honte=0;
A1=0;
A2=0;
Ice1=0;
Ice2=0;
ellscale=25;
TAU1MAX=0;
TAU2MAX=0;
end


for i=1:1:46
    for j=1:1:70
 
            tet1=(i+118)*(pi/180);
            tet2=(j+90)*(pi/180);
            xpj=a1*cos(tet1)+a2*cos(tet1+tet2)+a0;
            ypj=a1*sin(tet1)+a2*sin(tet1+tet2);
            dp=sqrt(xpj^2+ypj^2);
           
            
            if 0.30001>dp
                
                rd1=dp;
                conte=conte+1;
                xp=xpj;
                yp=ypj;
                x12=a1*cos(tet1)+a2*cos(tet1+tet2);
                y12=a1*sin(tet1)+a2*sin(tet1+tet2);
                a12=sqrt(x12^2+y12^2);
                Hx(1,conte)=xpj;
                Hy(1,conte)=ypj;
                [X,Y]=meshgrid(xp,yp);
                  
                   Tx3vali=-220;
                   M1y3vali=-220;
                   N3vali=-220;
                   
                   N3valj=220;
                   Tx3valj=220;
                   M1y3valj=220;
                   
               for l=1:1:360
                   Tet3=l-1;
                   tet3=(l-1)*pi/180;
                   rd=sqrt((xpj-a3*cos(tet3))^2+(ypj-a3*sin(tet3))^2);
                   mu=2*asin(0.5*rd/ap);
                   rd=sqrt((xpj-a3*cos(tet3))^2+(ypj-a3*sin(tet3))^2);
                    delta=atan2((-ypj+a3*sin(tet3)),(-xpj+a3*cos(tet3)));
                    phieff=delta+0.5*(pi-mu);
                    mx=xpj+ap*cos(phieff)-a3*cos(tet3);
                    my=ypj+ap*sin(phieff)-a3*sin(tet3);
                   den3=a4*ap*sin(mu);
                  
                   
                   N3val=-(mx*cos(tet3)+my*sin(tet3))/(den3);
                   Tx3val=(my*cos(tet3)-mx*sin(tet3))/(den3);
                   M1y3val=a3*Tx3val;
                   
                   if N3val>N3vali
                       N3vali=N3val;
                   end
                   if N3val<N3valj
                       N3valj=N3val;
                   end
                   if Tx3val>Tx3vali
                       Tx3vali=Tx3val;
                   end
                   if Tx3val<Tx3valj
                       Tx3valj=Tx3val;
                   end
                   if M1y3val>M1y3vali
                       M1y3vali=M1y3val;
                   end
                   if M1y3val<M1y3valj
                       M1y3valj=M1y3val;
                   end
                  
                  
                   
                   N3max(1,conte)=N3vali;
                   N3min(1,conte)=N3valj;
                   Tx3max(1,conte)=Tx3vali;
                   Tx3min(1,conte)=Tx3valj;
                   M1y3max(1,conte)=M1y3vali;
                   M1y3min(1,conte)=M1y3valj;
                   
               end
                   
             
            
            
            end
   end
end

calcellipse=1;
calc3d=1;
calc2d=1;
calcws=1;
for Workspace=1:1:1
if calcws==1
rsl=0.300;
theta=linspace(0,2*pi);
xwsb=rsl*cos(theta);
ywsb=rsl*sin(theta);                             
end
end

carmax1=1;
carmin1=1;
carmax2=0;
carmin2=0;
carmax3=0;
carmin3=0;

for calcularm3=1:1
    if carmax1==1
        figure (15)
        hold on
        grid on
        title('Maximum values of A_{x,3}')
        scatter3(Hx,Hy,N3max,'B');
        xlabel('x (m)')
        ylabel('y (m)')
        zlabel(' A_{x,3} (N)') 
        hold off
        
        figure (16)
        hold on
        grid on
        title('Maximum values of S_{z,3}')
        scatter3(Hx,Hy,Tx3max,'B');
        xlabel('x (m)')
        ylabel('y (m)')
        zlabel(' S_{z,3} (N)') 
        hold off
        figure (17)
        hold on
        grid on
        title('Maximum values of M_{y,3}')
        scatter3(Hx,Hy,M1y3max,'B');
        xlabel('x (m)')
        ylabel('y (m)')
        zlabel(' M_{y,3} (Nm)') 
        hold off
        
    end
        if carmin1==1
        figure (18)
        hold on
        grid on
        title('Minimum values of A_{x,3}')
        scatter3(Hx,Hy,N3min,'B');
        xlabel('x (m)')
        ylabel('y (m)')
        zlabel(' A_{x,3} (N)') 
        hold off
        figure (19)
        hold on
        grid on
        title('Minimum values of S_{z,3}')
        scatter3(Hx,Hy,Tx3min,'B');
        xlabel('x (m)')
        ylabel('y (m)')
        zlabel(' S_{z,3} (N)') 
        hold off
        figure (20)
        hold on
        grid on
        title('Minimum values of M_{y,3}')
        scatter3(Hx,Hy,M1y3min,'B');
        xlabel('x (m)')
        ylabel('y (m)')
        zlabel(' M_{y,3} (Nm)') 
        hold off
       
        end
end
